# Supplementary material for: Mistletoe-Extract Drugs Stimulate Anti-Cancer Vγ9Vδ2 T Cells
Source: PubMed Central journal article supplement (PMC7349316; doi:10.3390/cells9061560), 2020-06-26
Supplement: cells-09-01560-s001.pdf [file cells-09-01560-s001.pdf]

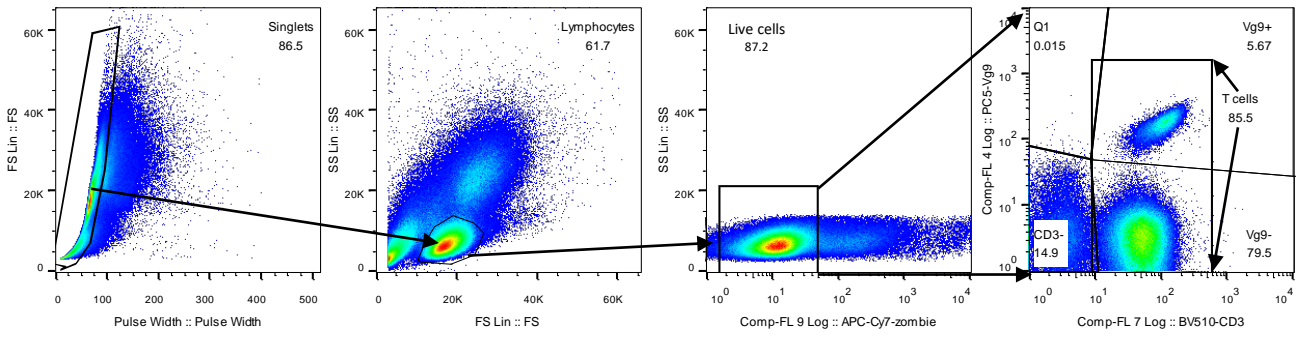

**Supplemental Figure 1. Gating strategy for live cells and for the main subsets studied in this article.**

**A**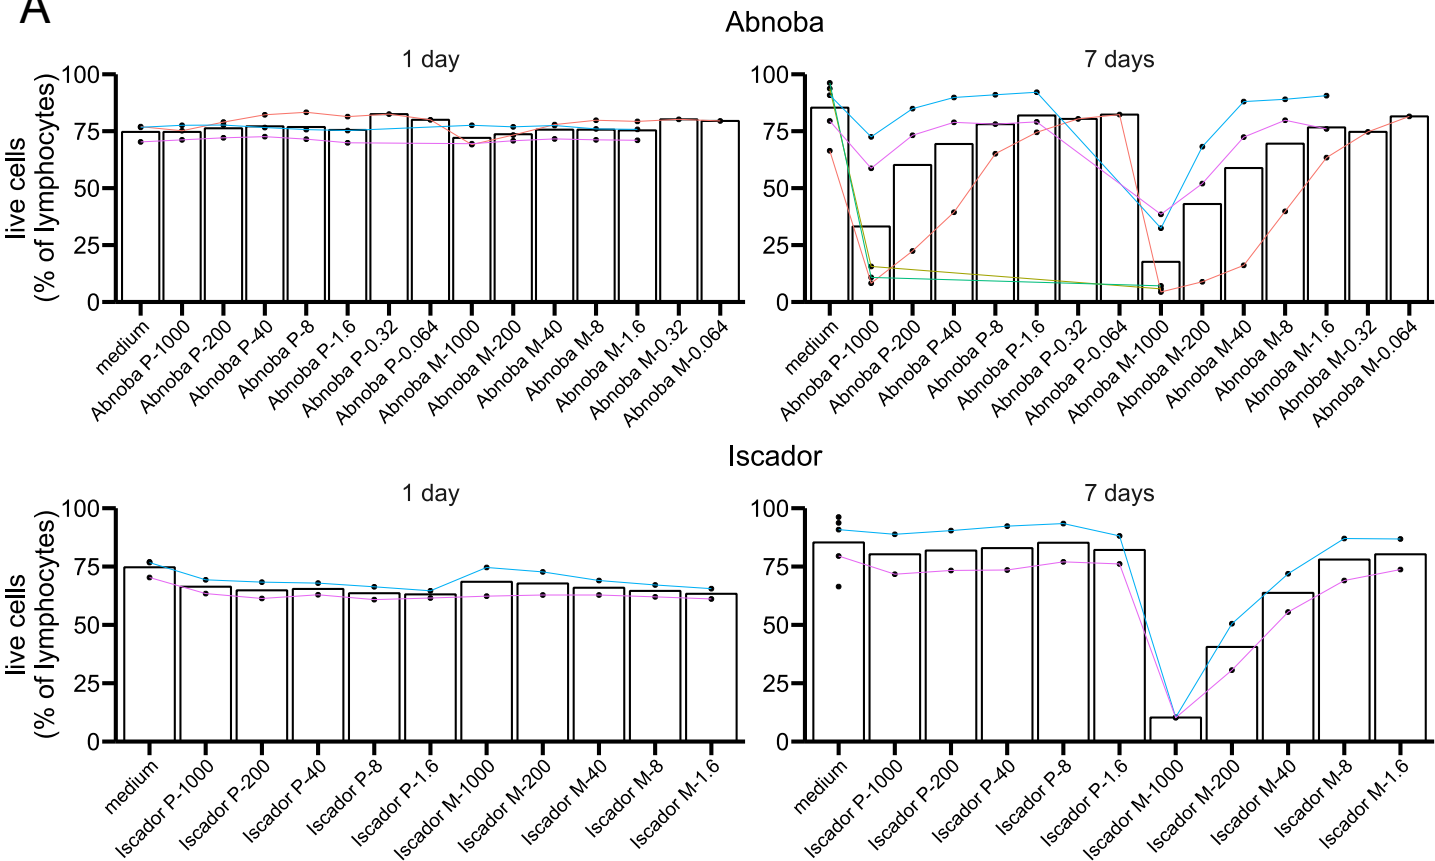**B**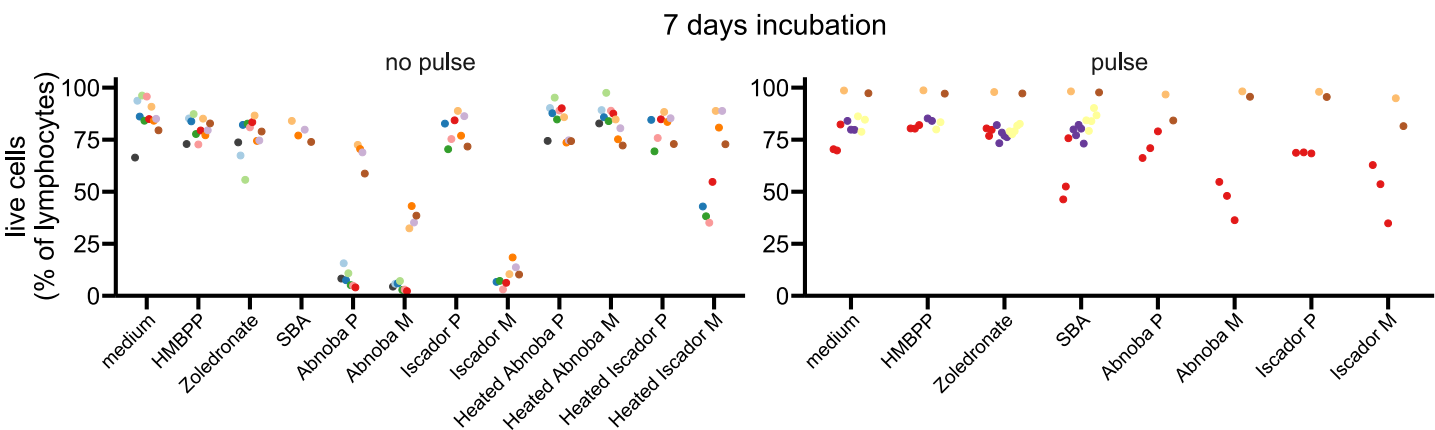

**Supplemental Figure 2. In vitro cytotoxicity on PBMCs of each mistletoe-extract drug.**

**(A)** Percentage of lymphocytes that are negative for staining with the Zombie-NIR viability dye. Lines connect the same subjects ( $n=2-5$ ), bars indicate mean values. Concentrations (in  $\mu\text{g}/\text{ml}$ ) are indicated after the extract names on the X-axis. Incubation times (1 day or 7 days) are indicated.

**(B)** Zombie-NIR negative percentage of lymphocytes within each stimulation after 7 days incubation. Data are from all the 5 or 7 days tests used in this paper. Lines connect the same subject and each color represent one subject ( $n=13$ ); each dot represents an independent experiment.

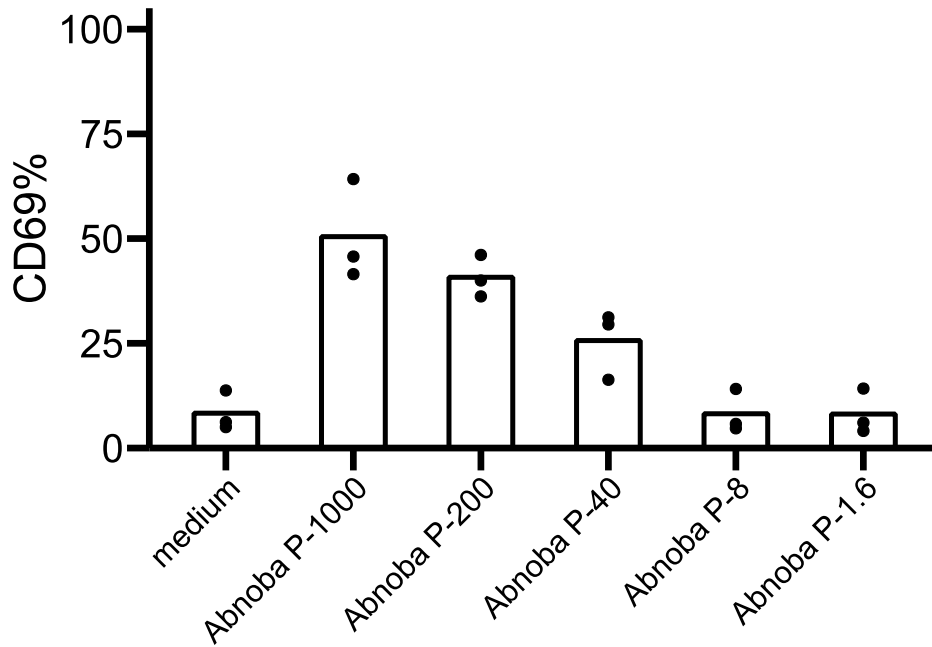

**Supplemental Figure 3. CD69 expression on Vy9+ T cells after 1-day stimulation with different concentrations of AbnobaViscum Pini (Abnoba P).**

Bars indicate mean value; concentrations are indicated after the stimulant name on the X-axis. Each dot represent the data of one subject.

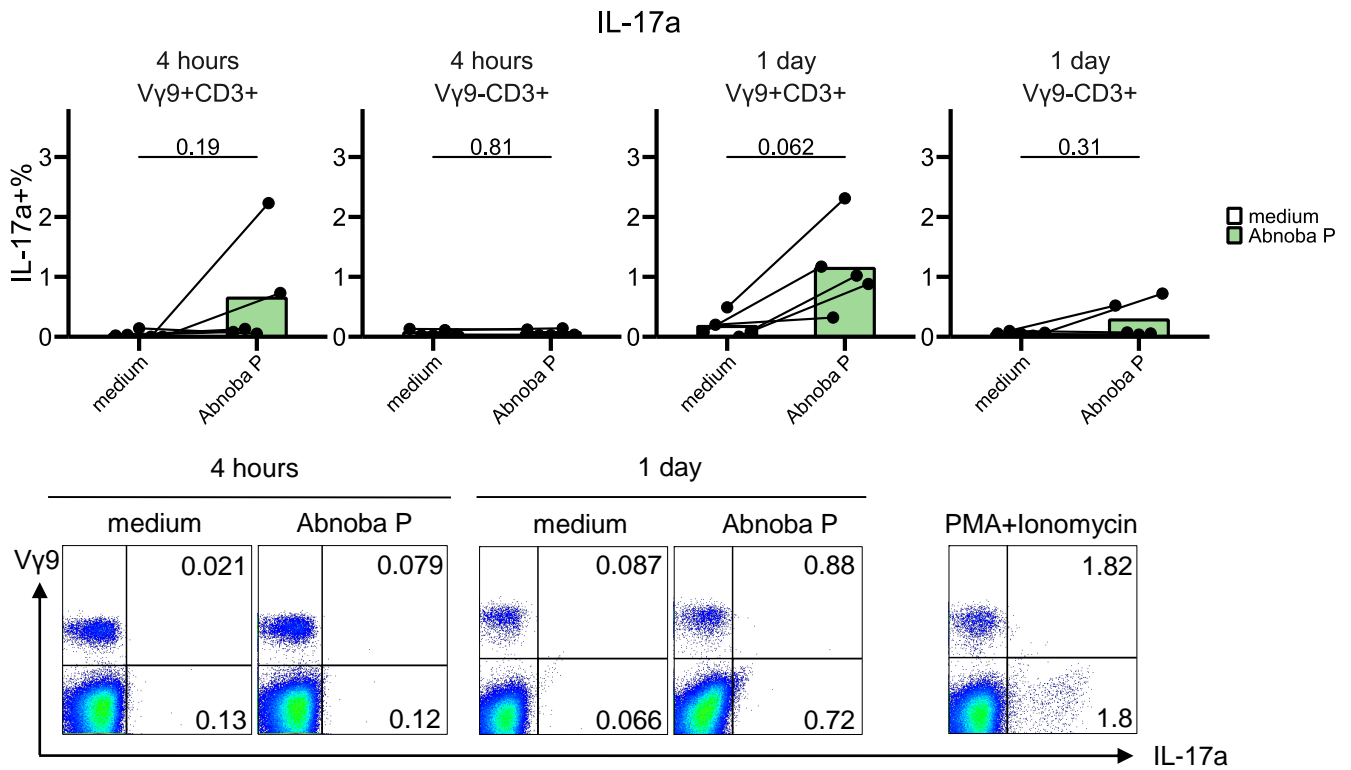

**Supplemental Figure 4. Absence of IL-17a induction by AbnobaViscum Pini (Abnoba P) stimulation in Vγ9+ T cells and Vγ9- T cells.**

Lines connect the same subject (n=5), bars indicate mean value. Values on the graphs indicate p values (obtained with the Wilcoxon signed-rank test). Bottom panels show representative flow cytometry plots (gate on CD3+ T cells). Upper and lower numbers indicate percentages of IL-17-positive cells in Vγ9+ T cells and Vγ9- T cells respectively. Incubation time (4h or 1 day) is indicated.
